# Supplementary material for: Synthesis of Anti-Inflammatory Drugs’ Chalcone Derivatives and a Study of Their Conformational Properties Through a Combination of Nuclear Magnetic Resonance Spectroscopy and Molecular Modeling
Source: MDPI journal article supplement (doi:10.3390/ph18010088), 2025-01-13
Supplement: s1 [file s1]

SUPPORTING INFORMATION

**Synthesis of anti-inflammatory drugs' chalcone derivatives and a study of their conformational properties through a combination of NMR spectroscopy and molecular modeling**

Nikitas Georgiou<sup>1</sup>, Andromachi Tzani<sup>2</sup>, Kyriaki Vavougyiou<sup>1</sup>, Christos Papadopoulos<sup>3</sup>, Nikolaos Eleftheriadis<sup>3</sup>, Primož Sket<sup>4</sup>, Demeter Tzeli<sup>5,6</sup>, Tuomas Niemi-Aro<sup>7</sup>, Anastasia Detsi<sup>2</sup>, Thomas Mavromoustakos<sup>1\*</sup>

<sup>1</sup>Laboratory of Organic Chemistry, Department of Chemistry, National and Kapodistrian University of Athens, Panepistimioupolis Zografou, 11571 Athens, Greece

<sup>2</sup>Laboratory of Organic Chemistry, Department of Chemical Sciences, School of Chemical Engineering, National Technical University of Athens, Heroon Polytechniou 9, Zografou Campus, 15780 Athens, Greece

<sup>3</sup>Department of Chemistry, University of Crete, Voutes, 70013 Heraklion, Greece

<sup>4</sup>Slovenian NMR Centre, National Institute of Chemistry, SI-1001 Ljubljana, Slovenia

<sup>5</sup>Laboratory of Physical Chemistry, Department of Chemistry, National and Kapodistrian University of Athens, Panepistimioupolis Zografou, 11571 Athens, Greece

<sup>6</sup>Theoretical and Physical Chemistry Institute, National Hellenic Research Foundation, 48 Vassileos Constantinou Ave., 11635 Athens, Greece

<sup>7</sup>Institute of Biotechnology, Helsinki Institute of Life Sciences, P.O 65 (Viikinkaari 1), 00014 University of Helsinki

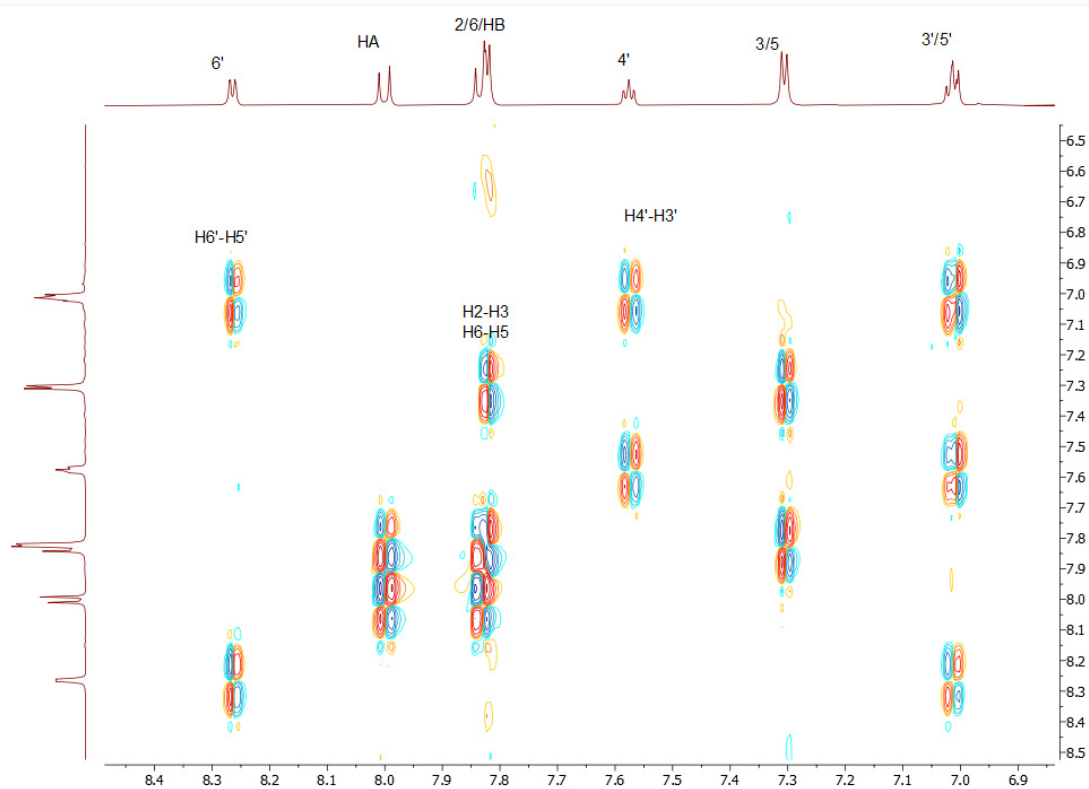

**Figure S1:** 2D-COSY NMR spectrum of compound 1. The spectra were recorded in DMSO- $d_6$  using a Bruker AC 850 MHz spectrometer at 25 °C.

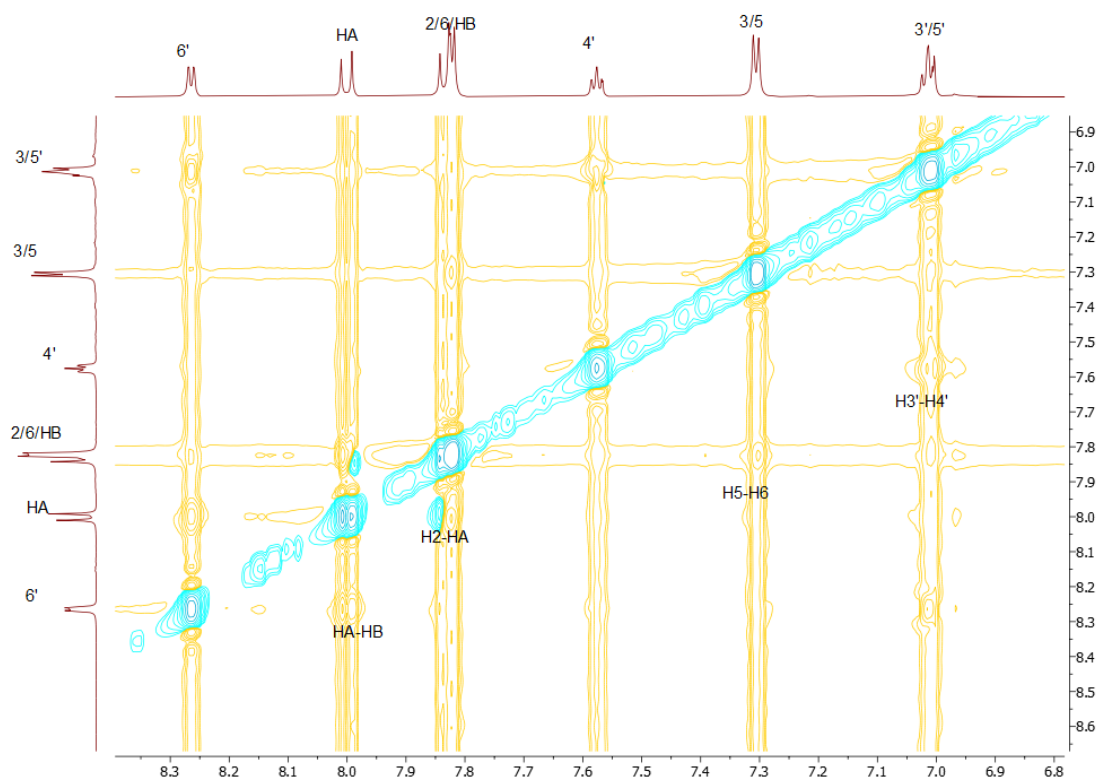

**Figure S2:** 2D-NOESY NMR spectrum of compound 1. The spectra were recorded in DMSO- $d_6$  using a Bruker AC 850 MHz spectrometer at 25 °C.

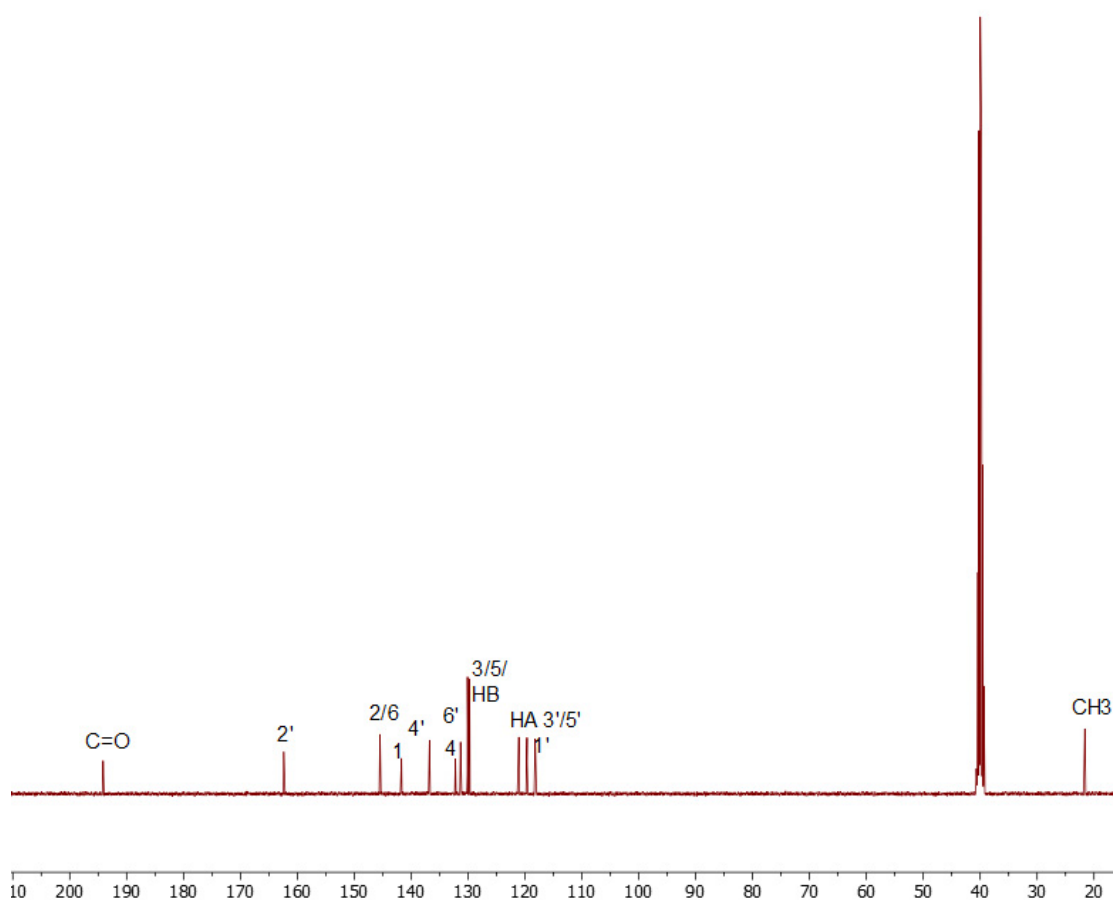

**Figure S3:**  $^{13}\text{C}$  NMR spectrum of compound 1. The spectra were recorded in  $\text{DMSO-d}_6$  using a Bruker AC 850 MHz spectrometer at 25  $^{\circ}\text{C}$ .

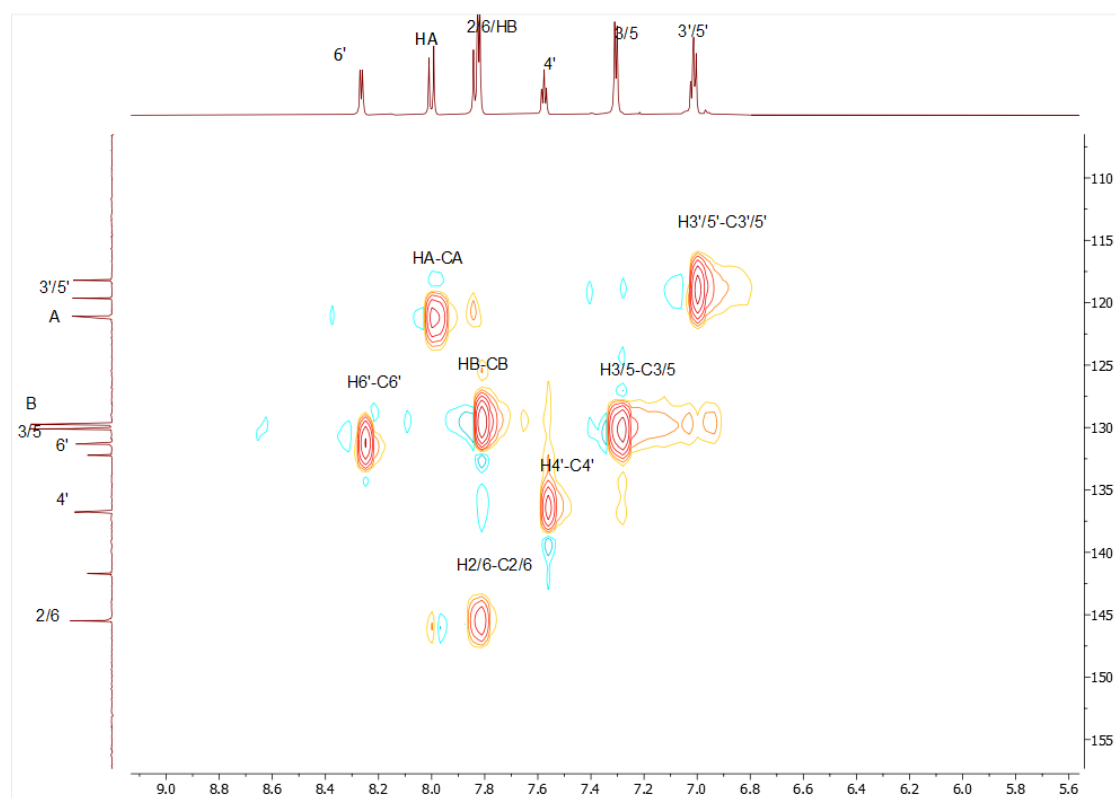

**Figure S4:** 2D-HSQC NMR spectrum of compound 1. The spectra were recorded in DMSO- $d_6$  using a Bruker AC 850 MHz spectrometer at 25 °C.

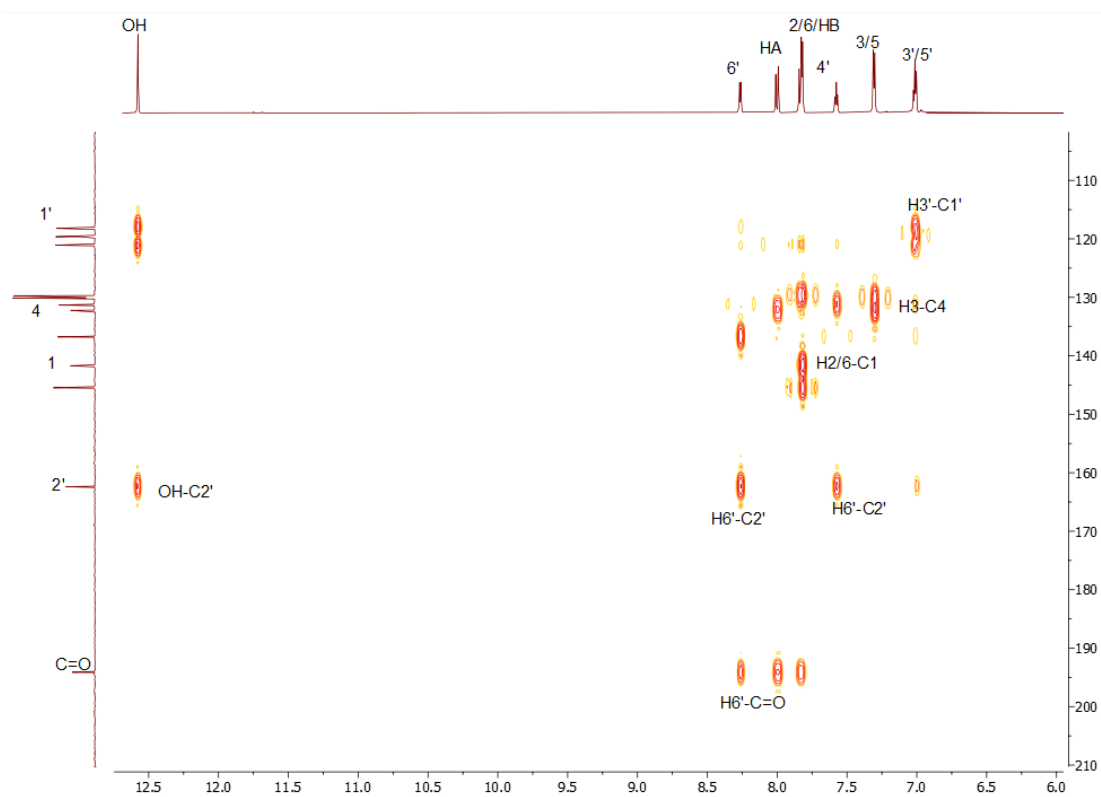

**Figure S5:** 2D-HMBC NMR spectrum of compound 1. The spectra were recorded in DMSO- $d_6$  using a Bruker AC 850 MHz spectrometer at 25 °C.

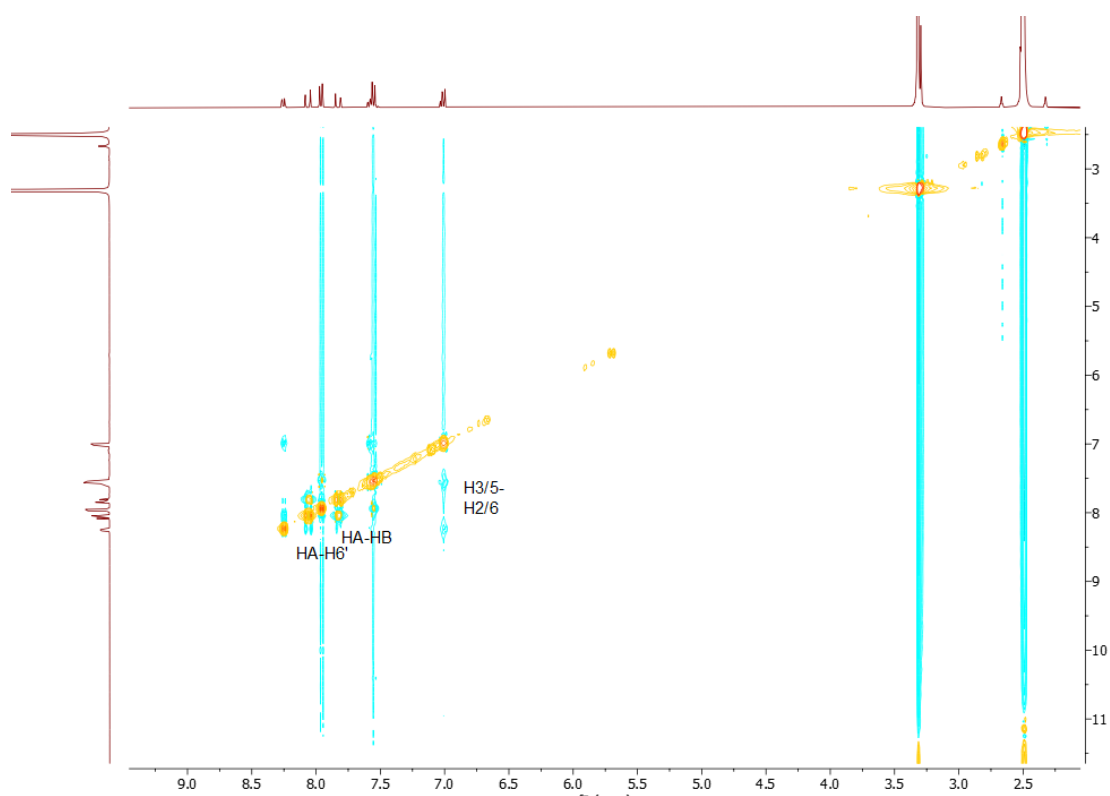

**Figure S6:** 2D-NOESY NMR spectrum of compound 2. The spectra were recorded in DMSO- $d_6$  using a Bruker AC 400 MHz spectrometer at 25 °C.

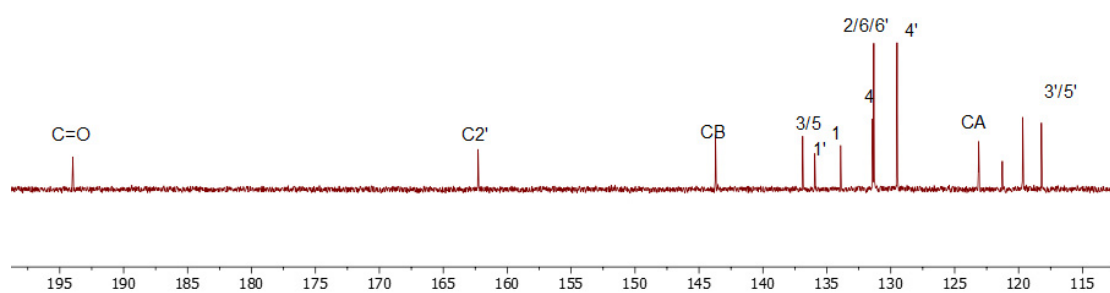

**Figure S7:**  $^{13}\text{C}$  NMR spectrum of compound 2. The spectra were recorded in DMSO- $d_6$  using a Bruker AC 400 MHz spectrometer at 25 °C.

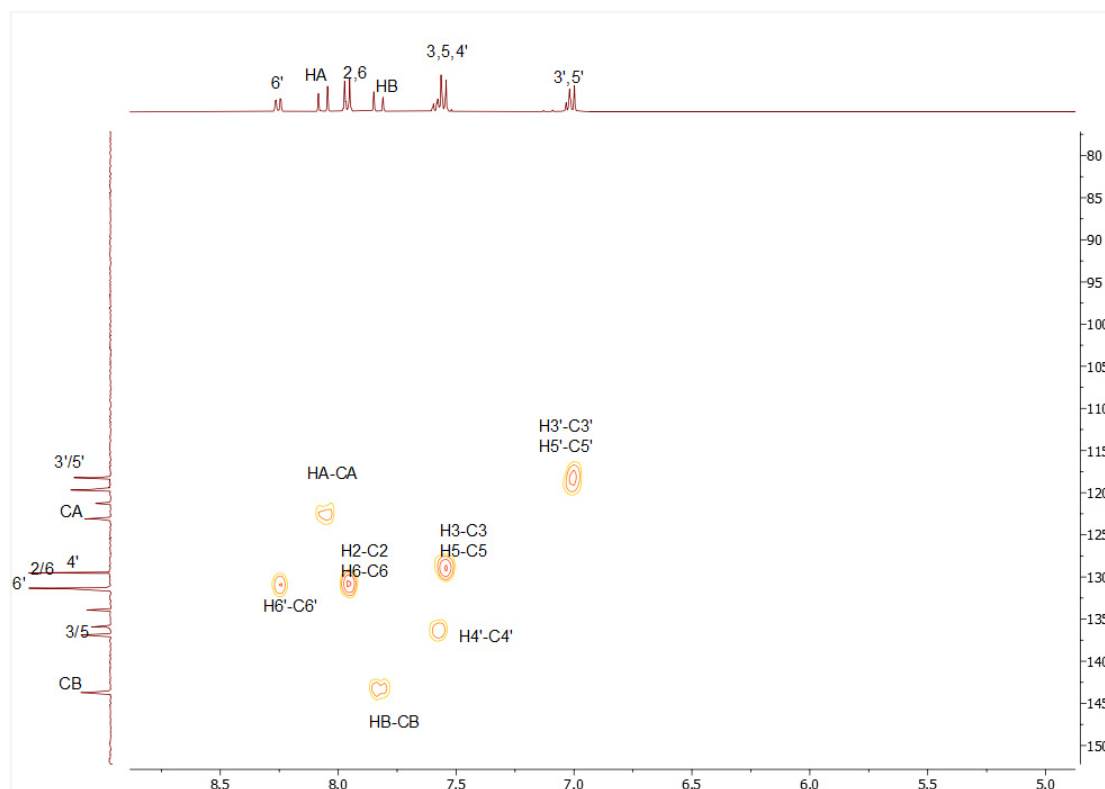

**Figure S8:** 2D-HSQC NMR spectrum of compound 2. The spectra were recorded in DMSO- $d_6$  using a Bruker AC 400 MHz spectrometer at 25 °C.

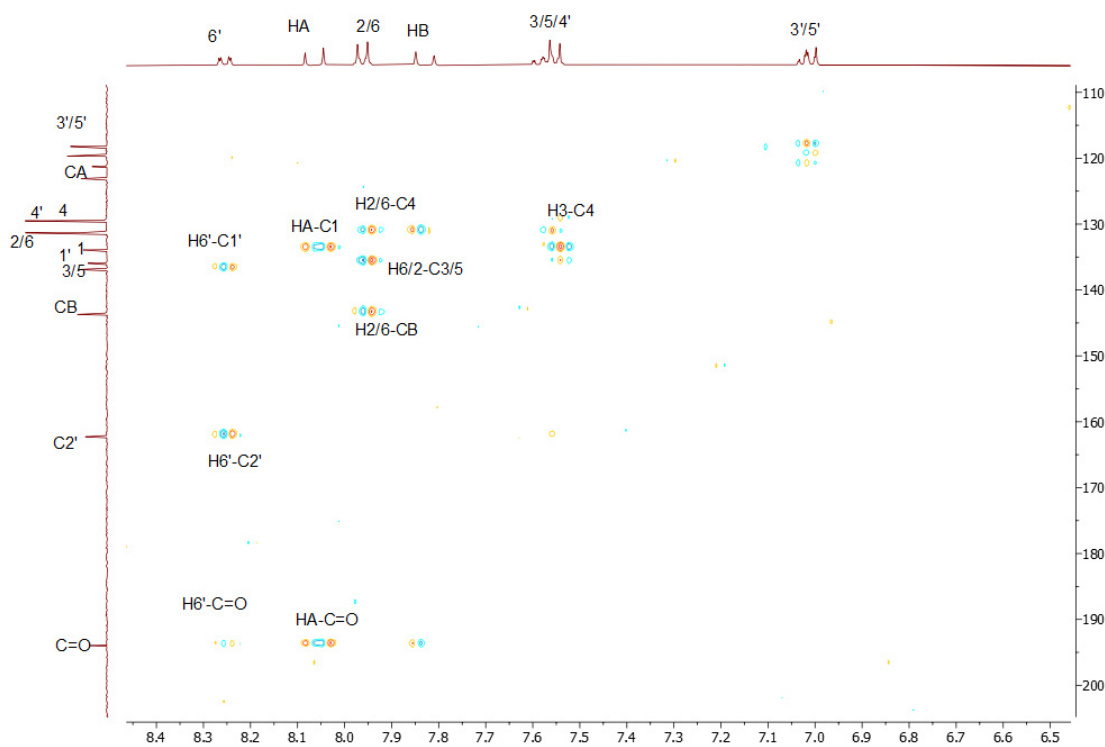

**Figure S9:** 2D-HMBC NMR spectrum of compound 2. The spectra were recorded in DMSO- $d_6$  using a Bruker AC 400 MHz spectrometer at 25 °C.

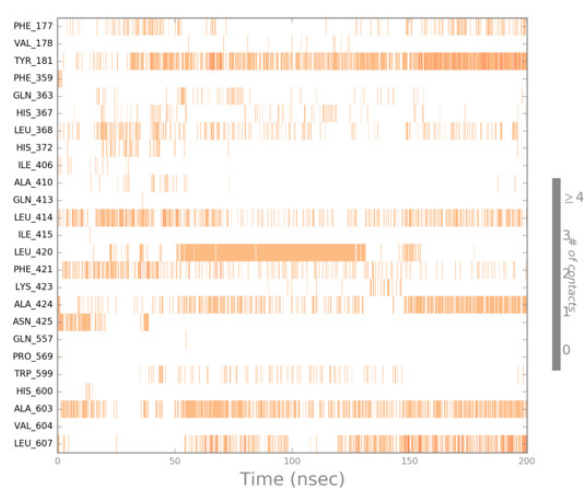

(a)

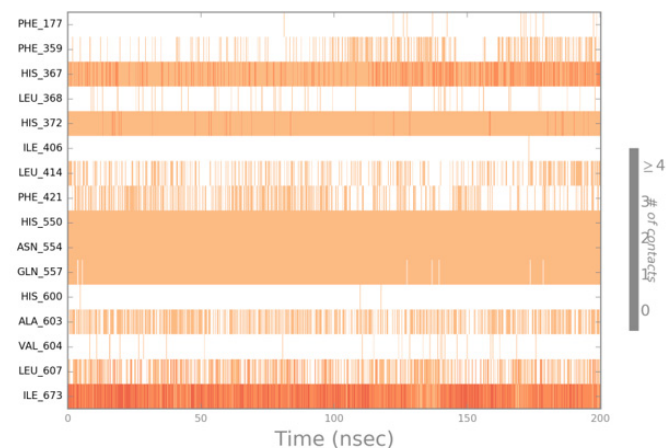

(b)

**Figure S10:** A timeline representation of protein–ligand contacts for compounds **1** (a) and **2** (b) during simulation with 5-LOX.

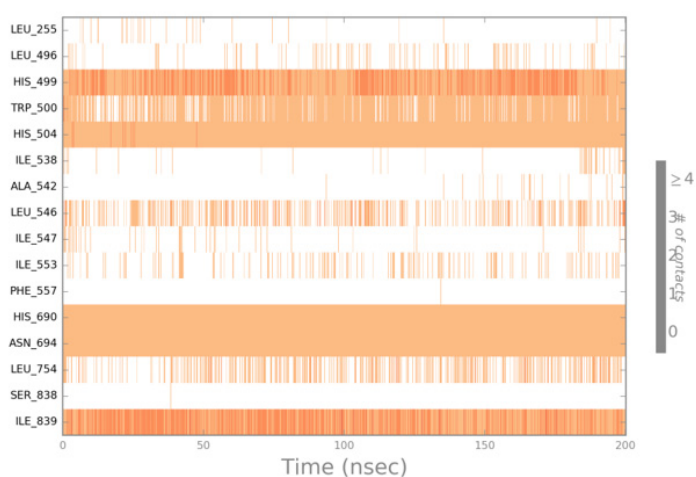

(a)

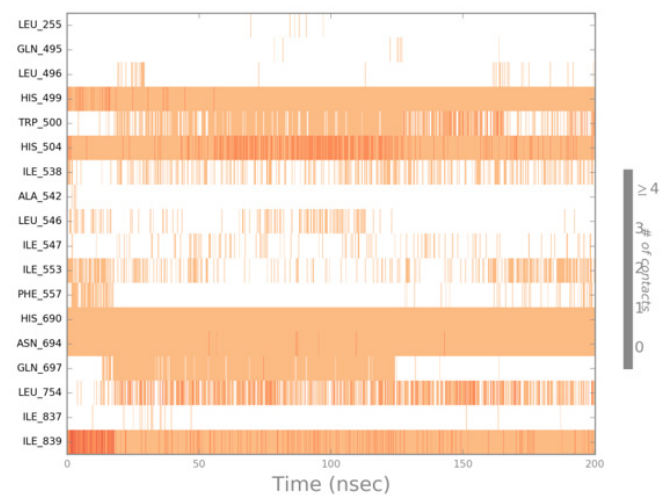

(b)

**Figure S11:** A timeline representation of protein–ligand contacts for compounds **1** (a) and **2** (b) during simulation with LOX-1.

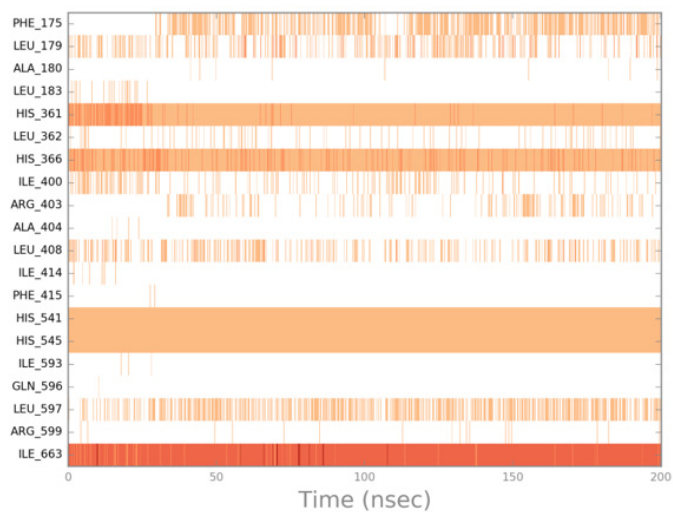

(a)

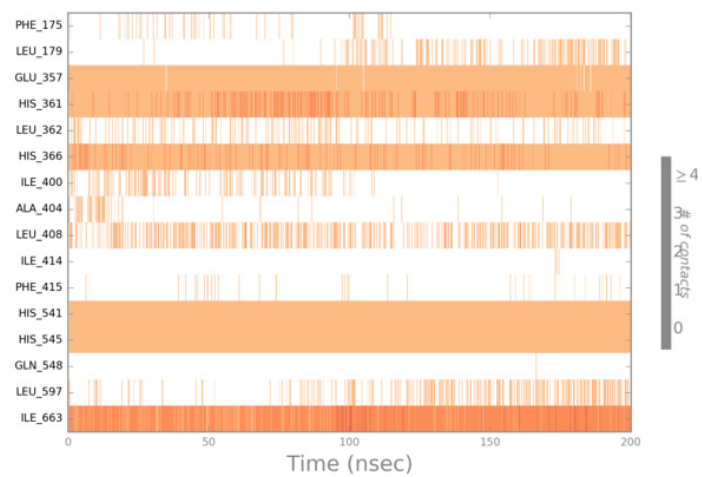

(b)

**Figure S12:** A timeline representation of protein–ligand contacts for compounds **1** (a) and **2** (b) during simulation with 15-LOX.
